# Supplementary material for: Green Growth Practice in Indonesia: Some Insight for Gambir Commodity in West Sumatra, Indonesia
Source: Research Square preprint supplement (doi:10.21203/rs.3.rs-2308544/v1), 2022-12-06
Supplement: Supplementary file 1 [file 65da0a06022b3eb12018bcd6.pdf]

## Green Growth Practice in Indonesia: Some Insight for Gambir Commodity in West Sumatra, Indonesia

Table 1. Performance Measurement Indicators of Gambir's Green Growth Practices

| No. | Criteria Green Growth                               | Indicator                                                         | Result         |
|-----|-----------------------------------------------------|-------------------------------------------------------------------|----------------|
| 1   | Sustainability Economic Growth                      | Quantity of production                                            | Improve output |
|     |                                                     | Profit/harvesting                                                 | Get profit     |
|     |                                                     | Income/harvesting                                                 | Increase       |
|     |                                                     | Expenditure                                                       | Fixed          |
| 2   | Inclusive & Equitable Growth                        | Growth for Employee                                               | Fixed          |
|     |                                                     | Enough Primary Needs                                              | Enough         |
|     |                                                     | Educational level                                                 | Basic level    |
|     |                                                     | Transparency salary/wage without complain                         | Transparency   |
| 3   | Economic, Social, & Environmental Resilience        | Commodity price stability                                         | unstabilized   |
|     |                                                     | Low competitor price                                              | Decreased      |
|     |                                                     | Educational level                                                 | Basic educated |
|     |                                                     | Inovasion & diversifikasi product                                 | No             |
|     |                                                     | Complete facilities                                               | Not Enough     |
|     |                                                     | Access for infrastructure                                         | Good           |
|     |                                                     | Calmness in trying                                                | Yes            |
|     |                                                     | Avoid the danger of floods, landslides or other natural disasters | Yes            |
| 4   | Healthy and Productive Ecosystem Providing Services | There are still native plant and animal habitats available        | Yes            |
|     |                                                     | Comparable between residential and agricultural land              | Yes            |
|     |                                                     | Without pollutan and pollution                                    | Yes            |
|     |                                                     | Nutrients are still good                                          | Yes            |
|     |                                                     | Using technology and digitization                                 | No             |
| 5   | Greenhouse gas emission reduction                   | Good waste management                                             | Yes            |
|     |                                                     | Reducing the use of fossil fuels                                  | Not yet        |
|     |                                                     | Reducing use of plastic                                           | Yes            |
|     |                                                     | Using Organic Fertilizer                                          | Yes            |
|     |                                                     | Re-plant Gambir with New Seeds                                    | Yes            |

Source: Based on Interview
